# Supplementary material
Source: PubMed Central journal article supplement (PMC8408762)
Supplement: jama-e2113374-s004.pdf [file jama-e2113374-s004.pdf]

## Supplemental Online Content

McNamee JJ, Gillies MA, Barrett NA, et al; for the REST Investigators. Effect of Lower Tidal Volume Ventilation Facilitated by Extracorporeal Carbon Dioxide Removal vs Standard Care Ventilation on 90-Day Mortality in Patients With Acute Hypoxemic Respiratory Failure. *JAMA*. Published online August 31, 2021. doi:10.1001/jama.2021.13374

**Supplement 4.** eFigure 1. Treatment-by-subgroup interactions

eFigure 2. Physiological parameters by treatment group to day 7; PaO<sub>2</sub>/FiO<sub>2</sub> Ratio (A), Respiration Rate (B), Minute Ventilation (C), Partial Pressure of Arterial Carbon Dioxide (PaCO<sub>2</sub>) (D) and pH (E) to day 7

eTable 1. Pre-specified secondary endpoints

eTable 2. Enrollment by site

eTable 3. Treatment after trial entry

eTable 4. Daily mean (SD) physiological parameters to day 7

eTable 5. Mode of ventilation and use of adjunctive therapies

eTable 6. Serious Adverse Events related to the study intervention

eTable 7. Serious Adverse Events by System Organ Class

This supplemental material has been provided by the authors to give readers additional information about their work.

eFigure 1. Treatment-by-subgroup interactions

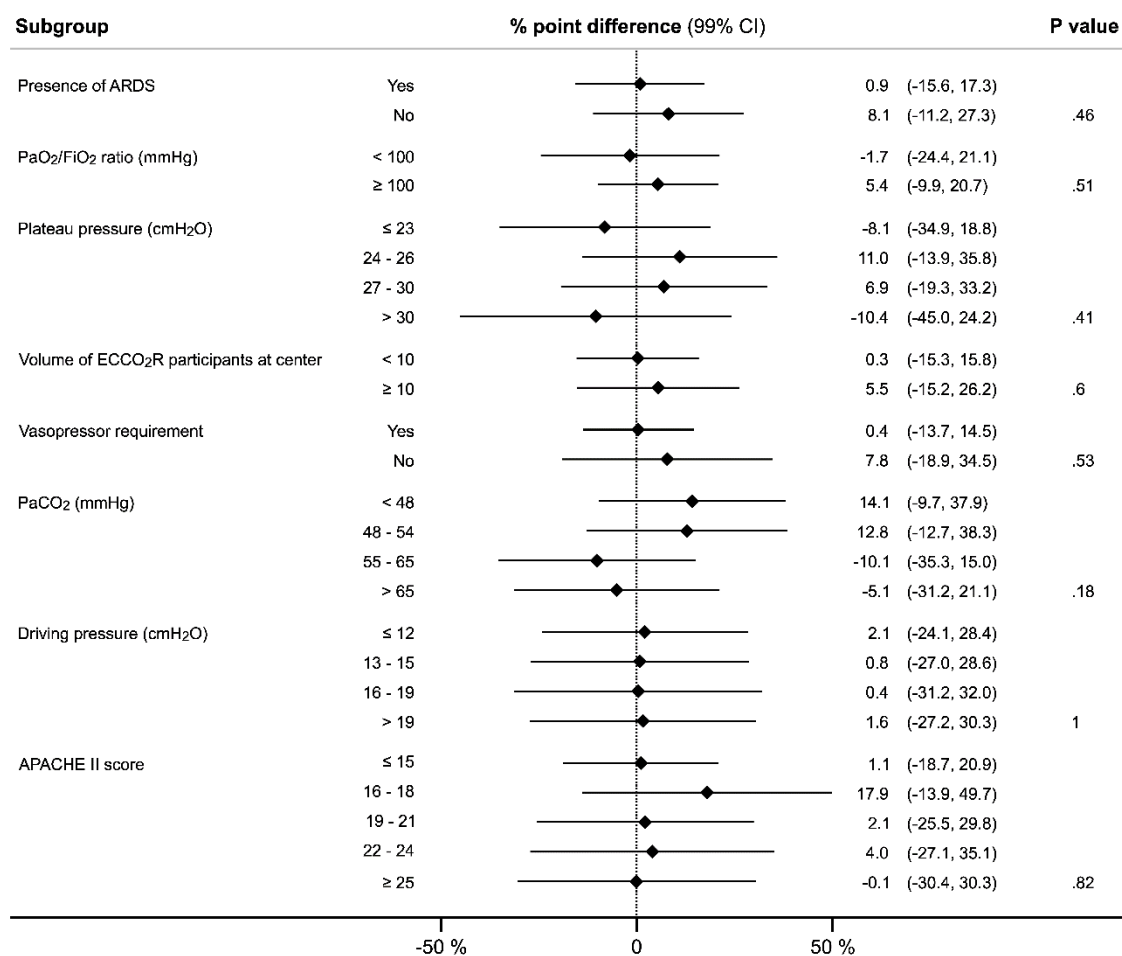

eFigure 2. Physiological parameters by treatment group to day 7; PaO<sub>2</sub>/FiO<sub>2</sub> Ratio (A), Respiration Rate (B), Minute Ventilation (C), Partial Pressure of Arterial Carbon Dioxide (PaCO<sub>2</sub>) (D) and pH (E) to day 7.

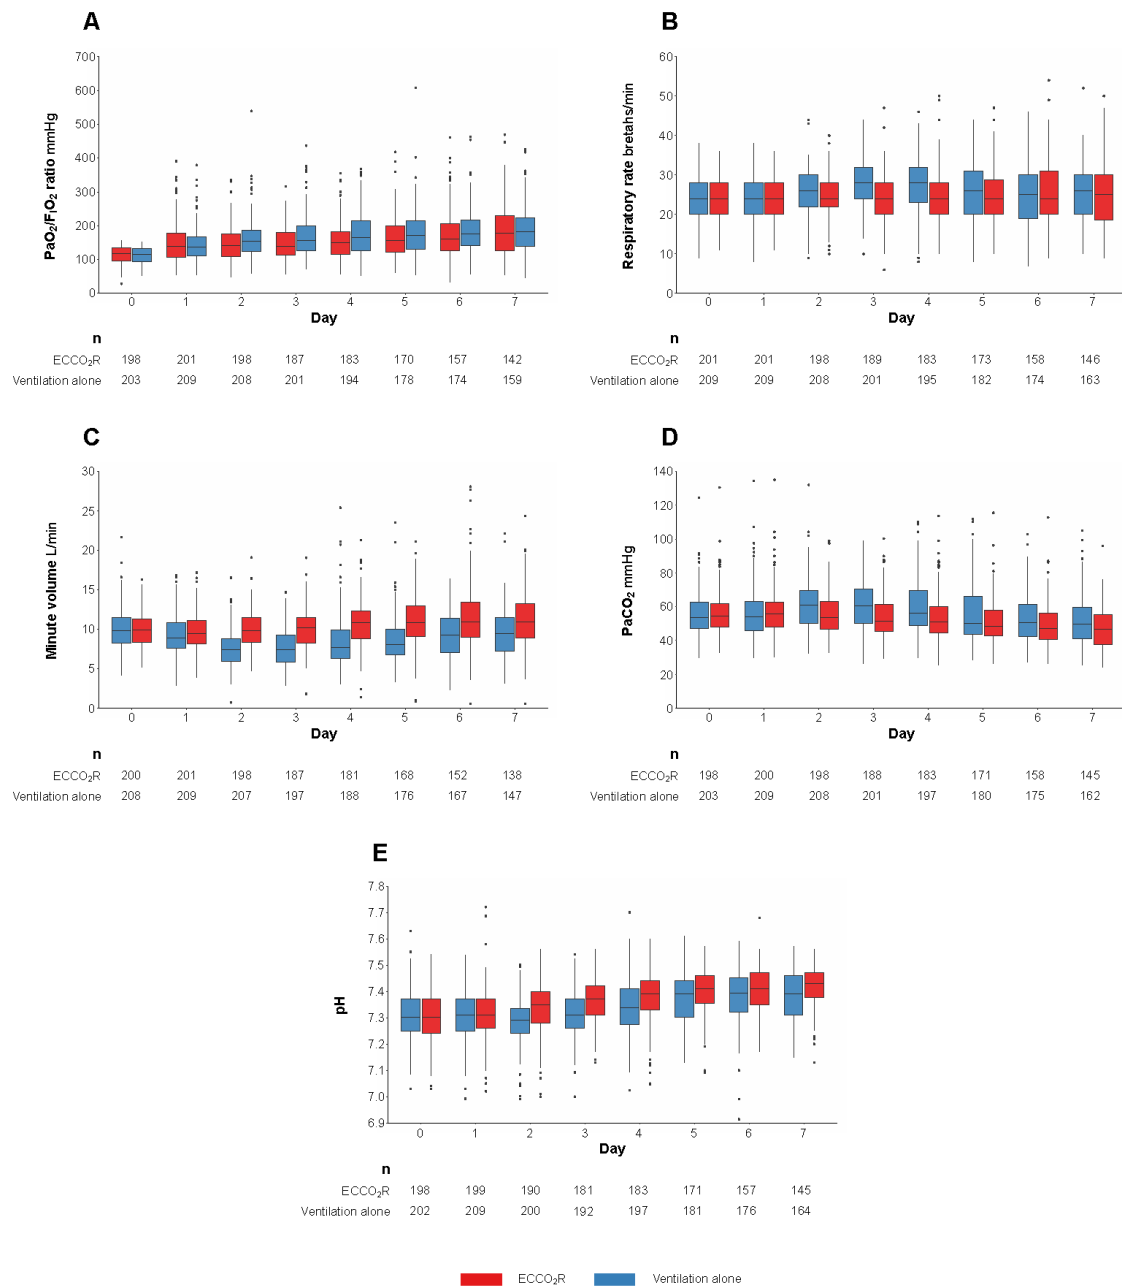

eTable 1. Pre-specified secondary endpoints.

|                                                                                                 |
|-------------------------------------------------------------------------------------------------|
| Tidal volume (mL/kg predicted body weight) at day 2 and day 3                                   |
| Ventilator free days at 28 days                                                                 |
| Duration of ventilation in survivors                                                            |
| Need for ECMO up to Day 7                                                                       |
| Mortality rate at 28 days, 6 months and 1 year                                                  |
| Health Related Quality of Life at 6 months and 1 year                                           |
| Adverse event rate                                                                              |
| Health and Social Care Service costs at 6 months and 1 year                                     |
| St George's Respiratory Questionnaire at 1 year and need for home oxygen at 6 months and 1 year |
| Post Traumatic Stress Syndrome Questionnaire at 1 year                                          |
| Montreal Cognitive Assessment or AD8 Dementia Screening Interview at 1 year                     |

eTable 2. Enrollment by site. The median no. of enrollees by site was 8, IQR [4 to 13].

| Study Site | ECCO <sub>2</sub> R | Ventilation alone |
|------------|---------------------|-------------------|
| 1          | 21                  | 21                |
| 2          | 18                  | 20                |
| 3          | 14                  | 14                |
| 4          | 12                  | 14                |
| 5          | 8                   | 8                 |
| 6          | 8                   | 10                |
| 7          | 7                   | 6                 |
| 8          | 7                   | 7                 |
| 9          | 7                   | 6                 |
| 10         | 6                   | 8                 |
| 11         | 6                   | 6                 |
| 12         | 6                   | 7                 |
| 13         | 6                   | 5                 |
| 14         | 6                   | 5                 |
| 15         | 5                   | 9                 |
| 16         | 5                   | 5                 |
| 17         | 4                   | 5                 |
| 18         | 4                   | 4                 |
| 19         | 4                   | 4                 |
| 20         | 4                   | 5                 |
| 21         | 4                   | 4                 |
| 22         | 3                   | 4                 |
| 23         | 3                   | 4                 |
| 24         | 3                   | 4                 |
| 25         | 3                   | 2                 |
| 26         | 3                   | 3                 |
| 27         | 3                   | 2                 |
| 28         | 3                   | 2                 |

| Study Site | ECCO <sub>2</sub> R | Ventilation alone |
|------------|---------------------|-------------------|
| 29         | 3                   | 4                 |
| 30         | 2                   | 1                 |
| 31         | 2                   | 1                 |
| 32         | 2                   | 3                 |
| 33         | 2                   | 2                 |
| 34         | 2                   | 1                 |
| 35         | 2                   | 0                 |
| 36         | 1                   | 0                 |
| 37         | 1                   | 1                 |
| 38         | 1                   | 1                 |
| 39         | 1                   | 0                 |
| 40         | 0                   | 1                 |
| 41         | 0                   | 1                 |

eTable 3. Treatment after trial entry.

|                                                                    | <b>ECCO<sub>2</sub>R<br/>n =202 (49%)</b> | <b>Ventilation<br/>alone<br/>n =210 (51%)</b> |
|--------------------------------------------------------------------|-------------------------------------------|-----------------------------------------------|
| No. of days on ECCO <sub>2</sub> R <sup>a</sup>                    | 4 (2), n=174                              | 2, n=1 <sup>b</sup>                           |
| No. of patients receiving non-protocol ECCO <sub>2</sub> R therapy |                                           |                                               |
| ECCO <sub>2</sub> R therapy > 7days                                | 10 (5%)                                   |                                               |
| ECCO <sub>2</sub> R therapy in standard care group                 |                                           | 1 (0%)                                        |
| Reasons for ECCO <sub>2</sub> R Discontinuation                    |                                           |                                               |
| ECCO <sub>2</sub> R therapy successfully weaned                    | 50 (28%)                                  |                                               |
| 7 days post randomization                                          | 33 (18%)                                  |                                               |
| Safety concern                                                     | 14 (8%)                                   |                                               |
| Escalation to ECMO                                                 | 12 (7%)                                   |                                               |
| Discontinuation of active medical treatment                        | 9 (5%)                                    |                                               |
| Death                                                              | 19 (11%)                                  |                                               |
| Other                                                              | 42 (24%)                                  |                                               |

<sup>a</sup>17 (8%) intervention patients did not commence ECCO<sub>2</sub>R.

<sup>b</sup>1 patient on ECCO<sub>2</sub>R for 2 days

eTable 4. Daily mean (SD) physiological parameters to day 7.

|                                          | <b>ECCO<sub>2</sub>R</b> | <b>Ventilation alone</b> | <b>Mean Difference<br/>(95% CI)</b> |
|------------------------------------------|--------------------------|--------------------------|-------------------------------------|
| Tidal volume mL/kg PBW                   |                          |                          |                                     |
| Day 2                                    | 4.5(1.6) n=198           | 6.5(1.7) n=207           | -2.0(-2.3, -1.7)                    |
| Day 3                                    | 4.4(1.7) n=187           | 6.7(1.9) n=197           | -2.3(-2.7, -2.0)                    |
| Day 4                                    | 5.0(2.2) n=181           | 7.0(2.0) n=188           | -2.0(-2.4, -1.6)                    |
| Day 5                                    | 5.7(2.4) n=168           | 7.1(2.0) n=176           | -1.3(-1.8, -0.9)                    |
| Day 6                                    | 6.3(3.0) n=152           | 7.2(2.2) n=167           | -0.9(-1.5, -0.3)                    |
| Day 7                                    | 6.3(2.5) n=138           | 7.2(1.9) n=147           | -0.9(-1.4, -0.4)                    |
| Tidal volume mL/kg PBW <sup>a</sup>      |                          |                          |                                     |
| Day 2                                    | 4.2(1.2) n=148           | 6.5(1.7) n=207           | -2.4(-2.7, -2.0)                    |
| Day 3                                    | 3.8(0.8) n=120           | 6.7(1.9) n=197           | -2.9(-3.3, -2.5)                    |
| PaO <sub>2</sub> /FiO <sub>2</sub> ratio |                          |                          |                                     |
| Day 1                                    | 153.1(84.0) n=201        | 145.1(48.3) n=209        | 8.0(-5.3, 21.2)                     |
| Day 2                                    | 147.8(52.5) n=198        | 161.1(57.1) n=208        | -13.3(-24.1, -2.6)                  |
| Day 3                                    | 147.9(48.5) n=187        | 167.0(60.5) n=201        | -19.1(-30.1, -8.2)                  |
| Day 4                                    | 160.8(92.1) n=183        | 171.8(62.2) n=194        | -11.0(-26.8, 4.8)                   |
| Day 5                                    | 171.3(102.3) n=170       | 178.9(69.9) n=178        | -7.6(-26.0, 10.8)                   |
| Day 6                                    | 175.3(69.9) n=157        | 182.6(66.0) n=174        | -7.3(-22.0, 7.4)                    |
| Day 7                                    | 187.8(77.0) n=142        | 188.1(67.6) n=159        | -0.2(-16.6, 16.2)                   |
| PEEP (cmH <sub>2</sub> O)                |                          |                          |                                     |
| Day 1                                    | 11.0(3.1) n=201          | 10.5(3.0) n=209          | 0.5(-0.1, 1.1)                      |
| Day 2                                    | 11.3(3.2) n=197          | 10.6(3.0) n=206          | 0.7(0.1, 1.3)                       |
| Day 3                                    | 11.3(3.1) n=187          | 10.0(3.1) n=197          | 1.4(0.7, 2.0)                       |
| Day 4                                    | 11.1(3.2) n=178          | 9.9(2.8) n=187           | 1.2(0.6, 1.8)                       |
| Day 5                                    | 10.8(3.4) n=162          | 9.6(2.8) n=175           | 1.2(0.6, 1.9)                       |
| Day 6                                    | 10.0(3.2) n=147          | 9.3(2.8) n=167           | 0.7(0.0, 1.3)                       |
| Day 7                                    | 9.7(3.5) n=132           | 9.1(2.5) n=147           | 0.6(-0.2, 1.3)                      |
| Plateau Pressure (cmH <sub>2</sub> O)    |                          |                          |                                     |
| Day 1                                    | 25.9(5.2) n=158          | 26.1(5.3) n=160          | -0.2(-1.4, 0.9)                     |
| Day 2                                    | 23.5(5.2) n=155          | 25.7(5.4) n=161          | -2.3(-3.4, -1.1)                    |
| Day 3                                    | 22.8(5.3) n=152          | 24.1(6.4) n=155          | -1.3(-2.6, 0.1)                     |
| Day 4                                    | 22.2(5.6) n=147          | 23.7(6.5) n=135          | -1.6(-3.0, -0.1)                    |
| Day 5                                    | 22.7(5.9) n=122          | 23.9(7.2) n=111          | -1.2(-2.9, 0.4)                     |
| Day 6                                    | 23.0(5.9) n=108          | 22.2(7.4) n=98           | 0.8(-1.1, 2.6)                      |
| Day 7                                    | 22.1(6.4) n=89           | 22.6(6.9) n=86           | -0.5(-2.5, 1.5)                     |
| Driving Pressure (cmH <sub>2</sub> O)    |                          |                          |                                     |
| Day 1                                    | 14.9(5.3) n=158          | 15.8(5.5) n=160          | -0.9(-2.1, 0.3)                     |
| Day 2                                    | 12.1(4.9) n=154          | 15.3(5.7) n=160          | -3.2(-4.4, -2.1)                    |
| Day 3                                    | 11.4(4.7) n=152          | 14.2(6.1) n=153          | -2.8(-4.0, -1.6)                    |
| Day 4                                    | 11.1(5.3) n=145          | 13.8(6.2) n=134          | -2.7(-4.1, -1.3)                    |
| Day 5                                    | 11.7(5.6) n=119          | 14.1(6.2) n=110          | -2.4(-3.9, -0.9)                    |
| Day 6                                    | 12.5(5.6) n=107          | 12.6(6.7) n=97           | -0.1(-1.8, 1.6)                     |
| Day 7                                    | 12.3(6.2) n=88           | 13.2(6.1) n=86           | -0.9(-2.7, 0.9)                     |
| PaCO <sub>2</sub> mmH                    |                          |                          |                                     |
| Day 1                                    | 55.8(14.4) n=200         | 56.6(13.8) n=209         | -0.8(-3.5, 2.0)                     |
| Day 2                                    | 60.8(14.6) n=198         | 56.0(14.7) n=208         | 4.8(2.0, 7.7)                       |
| Day 3                                    | 60.8(14.3) n=188         | 54.2(12.7) n=201         | 6.7(4.0, 9.4)                       |
| Day 4                                    | 59.0(15.7) n=183         | 53.3(14.0) n=197         | 5.7(2.8, 8.7)                       |
| Day 5                                    | 55.0(16.6) n=171         | 51.4(13.5) n=180         | 3.6(0.5, 6.8)                       |
| Day 6                                    | 53.2(14.4) n=158         | 49.4(12.9) n=175         | 3.8(0.8, 6.7)                       |

|                                           | <b>ECCO<sub>2</sub>R</b> | <b>Ventilation alone</b> | <b>Mean Difference<br/>(95% CI)</b> |
|-------------------------------------------|--------------------------|--------------------------|-------------------------------------|
| Day 7                                     | 52.4(15.4) n=145         | 47.7(12.6) n=162         | 4.8(1.6, 7.9)                       |
| <b>Respiratory Rate</b>                   |                          |                          |                                     |
| Day 1                                     | 23.9(5.02) n=201         | 23.9(5.24) n=209         | 0.01(-0.99, 1.01)                   |
| Day 2                                     | 26.6(5.70) n=198         | 24.6(5.38) n=208         | 1.95(0.87, 3.04)                    |
| Day 3                                     | 27.8(6.24) n=189         | 24.4(6.01) n=201         | 3.41(2.19, 4.63)                    |
| Day 4                                     | 27.0(7.09) n=183         | 24.4(6.53) n=195         | 2.61(1.23, 3.98)                    |
| Day 5                                     | 25.2(7.84) n=173         | 24.8(6.52) n=182         | 0.37(-1.13, 1.87)                   |
| Day 6                                     | 24.9(7.81) n=158         | 25.3(7.85) n=174         | -0.39(-2.09, 1.30)                  |
| Day 7                                     | 25.4(7.41) n=146         | 24.8(7.65) n=163         | 0.58(-1.11, 2.27)                   |
| <b>pH</b>                                 |                          |                          |                                     |
| Day 1                                     | 7.31(0.09) n=199         | 7.31(0.10) n=209         | -0.001(-0.02, 0.02)                 |
| Day 2                                     | 7.29(0.13) n=190         | 7.32(0.16) n=200         | -0.03(-0.1, -0.002)                 |
| Day 3                                     | 7.32(0.09) n=181         | 7.35(0.16) n=192         | -0.04(-0.1, -0.01)                  |
| Day 4                                     | 7.34(0.10) n=183         | 7.37(0.16) n=197         | -0.03(-0.05, 0.0005)                |
| Day 5                                     | 7.37(0.10) n=171         | 7.40(0.08) n=181         | -0.03(-0.05, -0.01)                 |
| Day 6                                     | 7.38(0.10) n=157         | 7.41(0.08) n=176         | -0.03(-0.05, -0.008)                |
| Day 7                                     | 7.38(0.10) n=145         | 7.42(0.08) n=164         | -0.03(-0.05, -0.01)                 |
| <b>Minute Volume</b>                      |                          |                          |                                     |
| Day 1                                     | 9.2(2.6) n=201           | 9.7(2.3) n=209           | -0.4(-0.9, 0.1)                     |
| Day 2                                     | 7.5(2.3) n=198           | 9.9(2.3) n=207           | -2.4(-2.9, -2.0)                    |
| Day 3                                     | 7.6(2.5) n=187           | 10.1(2.6) n=197          | -2.5(-3.0, -2.0)                    |
| Day 4                                     | 8.4(3.4) n=181           | 10.6(2.9) n=188          | -2.2(-2.9, -1.6)                    |
| Day 5                                     | 8.6(3.0) n=168           | 11.0(3.3) n=176          | -2.4(-3.1, -1.7)                    |
| Day 6                                     | 9.3(3.0) n=152           | 11.5(4.1) n=167          | -2.2(-3.0, -1.4)                    |
| Day 7                                     | 9.7(3.1) n=138           | 11.3(3.5) n=147          | -1.6(-2.4, -0.8)                    |
| <b>CO<sub>2</sub> removal (ml/minute)</b> |                          |                          |                                     |
| Day 1                                     | 53.6(40.8) n=158         |                          |                                     |
| Day 2                                     | 83.4(34.5) n=173         |                          |                                     |
| Day 3                                     | 85.4(35.0) n=171         |                          |                                     |
| Day 4                                     | 76.5(38.1) n=158         |                          |                                     |
| Day 5                                     | 65.7(41.6) n=139         |                          |                                     |
| Day 6                                     | 54.8(44.7) n=112         |                          |                                     |
| Day 7                                     | 46.1(44.3) n=95          |                          |                                     |

\*Per protocol population i.e. those who were on ECCO<sub>2</sub>R on day 2 and 3 in the intervention arm

eTable 5. Mode of ventilation and use of adjunctive therapies.

|                               | <b>ECCO<sub>2</sub>R</b> | <b>Ventilation alone</b> | <b>% Point Difference<br/>(95% CI)</b> |
|-------------------------------|--------------------------|--------------------------|----------------------------------------|
| <b>Mandatory Ventilation</b>  |                          |                          |                                        |
| Day 1                         | 165(82.1%)               | 170(81.3%)               | 0.7(-6.7, 8.2)                         |
| Day 2                         | 159(80.3%)               | 146(70.2%)               | 10.1(1.8, 18.4)                        |
| Day 3                         | 148(77.9%)               | 120(59.4%)               | 18.5(9.5, 27.5)                        |
| Day 4                         | 128(70.0%)               | 82(41.4%)                | 28.5(19.0, 38.1)                       |
| Day 5                         | 92(52.3%)                | 54(29.5%)                | 22.8(12.9, 32.7)                       |
| Day 6                         | 78(48.5%)                | 39(21.8%)                | 26.7(16.9, 36.5)                       |
| Day 7                         | 59(39.1%)                | 32(18.9%)                | 20.1(10.4, 29.9)                       |
| <b>Neuromuscular blockade</b> |                          |                          |                                        |
| Day 1                         | 103(51.2%)               | 101(48.3%)               | 2.9(-6.8, 12.6)                        |

|                             | <b>ECCO<sub>2</sub>R</b> | <b>Ventilation alone</b> | <b>% Point Difference<br/>(95% CI)</b> |
|-----------------------------|--------------------------|--------------------------|----------------------------------------|
| Day 2                       | 110(55.6%)               | 92(44.2%)                | 11.3(1.7, 21.0)                        |
| Day 3                       | 100(52.4%)               | 66(32.7%)                | 19.7(10.1, 29.3)                       |
| Day 4                       | 77(42.1%)                | 43(21.5%)                | 20.6(11.4, 29.7)                       |
| Day 5                       | 57(32.4%)                | 30(16.3%)                | 16.1(7.3, 24.8)                        |
| Day 6                       | 42(26.4%)                | 26(14.4%)                | 12.0(3.4, 20.5)                        |
| Day 7                       | 35(23.5%)                | 20(11.7%)                | 11.8(3.5, 20.1)                        |
| <b>Prone positioning</b>    |                          |                          |                                        |
| Day 1                       | 11(5.5%)                 | 29(13.9%)                | -8.4(-14.0, -2.8)                      |
| Day 2                       | 18(9.1%)                 | 27(13.0%)                | -3.9(-10.0, 2.2)                       |
| Day 3                       | 16(8.4%)                 | 17(8.4%)                 | 0.0(-5.5, 5.4)                         |
| Day 4                       | 16(8.7%)                 | 11(5.5%)                 | 3.2(-1.9, 8.4)                         |
| Day 5                       | 8(4.6%)                  | 7(3.8%)                  | 0.7(-3.4, 4.9)                         |
| Day 6                       | 3(1.9%)                  | 4(2.2%)                  | -0.3(-3.4, 2.7)                        |
| Day 7                       | 5(3.4%)                  | 6(3.5%)                  | -0.2(-4.1, 3.8)                        |
| <b>Inhaled nitric oxide</b> |                          |                          |                                        |
| Day 1                       | 5(2.5%)                  | 4(1.9%)                  | 0.6(-2.3, 3.4)                         |
| Day 2                       | 7(3.5%)                  | 4(1.9%)                  | 1.6(-1.6, 4.8)                         |
| Day 3                       | 5(2.6%)                  | 3(1.5%)                  | 1.1(-1.7, 3.9)                         |
| Day 4                       | 1(0.6%)                  | 2(1.0%)                  | -0.5(-2.2, 1.3)                        |
| Day 5                       | 1(0.6%)                  | 1(0.5%)                  | 0.0(-1.5, 1.6)                         |
| Day 6                       | 1(0.6%)                  | 1(0.6%)                  | 0.1(-1.6, 1.7)                         |
| Day 7                       | 1(0.7%)                  | 1(0.6%)                  | 0.1(-1.7, 1.8)                         |



eTable 6. Serious Adverse Events related to the study intervention.

|                                      |   |
|--------------------------------------|---|
| <b>Adverse Event</b>                 |   |
| Intracranial hemorrhage              | 5 |
| Thromboembolic disease               |   |
| Deep venous thrombosis               | 3 |
| Pulmonary embolism                   | 1 |
| Hemorrhage at other sites            |   |
| Bleeding from haemodialysis catheter | 1 |
| Hematoma                             | 1 |
| Airway                               | 1 |
| Thoracic                             | 1 |
| Cardiac                              |   |
| Cardiac Arrhythmia                   | 1 |
| Shock                                | 1 |
| Right heart failure                  | 1 |
| Vascular injury                      |   |
| Arterial                             | 1 |
| Venous                               | 1 |
| Cannula Failure                      | 1 |
| Device malfunction                   | 1 |
| Hyperkalemia                         | 1 |
| Heapanin Induced Thrombocytopenia    | 1 |

eTable 7. Serious Adverse Events by System Organ Class

|                                                      | <b>ECCO<sub>2</sub>R<br/>no. events</b> | <b>ECCO<sub>2</sub>R<br/>no.(%)<br/>patients<br/>n=202</b> | <b>Ventilation<br/>alone no.<br/>events</b> | <b>Ventilation<br/>alone no.(%)<br/>patients<br/>n=210</b> |
|------------------------------------------------------|-----------------------------------------|------------------------------------------------------------|---------------------------------------------|------------------------------------------------------------|
| Cardiac disorders                                    | 15                                      | 15(7.4%)                                                   | 9                                           | 9(4.3%)                                                    |
| Nervous system disorders                             | 10                                      | 10(5.0%)                                                   | 3                                           | 3(1.4%)                                                    |
| Respiratory, thoracic and mediastinal disorders      | 10                                      | 10(5.0%)                                                   | 2                                           | 2(1.0%)                                                    |
| Injury, poisoning and procedural complications       | 7                                       | 7(3.5%)                                                    | 1                                           | 1(0.5%)                                                    |
| Vascular disorders                                   | 7                                       | 7(3.5%)                                                    | 0                                           | 0(0.0%)                                                    |
| Gastrointestinal disorders                           | 6                                       | 6(3.0%)                                                    | 2                                           | 2(1.0%)                                                    |
| Infections and infestations                          | 5                                       | 5(2.5%)                                                    | 0                                           | 0(0.0%)                                                    |
| Blood and lymphatic system disorders                 | 3                                       | 3(1.5%)                                                    | 0                                           | 0(0.0%)                                                    |
| Renal and urinary disorders                          | 3                                       | 3(1.5%)                                                    | 2                                           | 2(1.0%)                                                    |
| Hepatobiliary disorders                              | 2                                       | 2(1.0%)                                                    | 0                                           | 0(0.0%)                                                    |
| General disorders and administration site conditions | 1                                       | 1(0.5%)                                                    | 1                                           | 1(0.5%)                                                    |
| Metabolism and nutrition disorders                   | 1                                       | 1(0.5%)                                                    | 0                                           | 0(0.0%)                                                    |
