# Supplementary material
Source: PubMed Central journal article supplement (PMC8408762)
Supplement: jama-e2113374-s005.pdf [file jama-e2113374-s005.pdf]

\*Indicates required information. Only first name, last name, and suffix will appear in PubMed.

| <b>*Group Name(s): REST Investigators</b> |                   |                              |                  |                                     |                                          |                                                         |                                                                                            |
|-------------------------------------------|-------------------|------------------------------|------------------|-------------------------------------|------------------------------------------|---------------------------------------------------------|--------------------------------------------------------------------------------------------|
| <b>*First Name and Middle Initial(s)</b>  | <b>*Last Name</b> | <b>*Suffix (eg, Jr, III)</b> | Academic Degrees | Institution                         | Location (city, state/province, country) | Role or Contribution, eg, chair, principal investigator | Group (if more than 1 Group listed in the byline and/or Subgroup (eg, Steering Committee)) |
| Temi                                      | Adedoyin          |                              | MPH              | Northwick Park Hospital             | London, England                          | Research Co-ordinator                                   | Research Site                                                                              |
| Kayode                                    | Adeniji           |                              | MSc              | Queen Alexandra Hospital            | Portsmouth, England                      | Principal Investigator                                  | Research Site                                                                              |
| Caroline                                  | Aherne            |                              | DipHE            | Royal Blackburn Hospital            | Lancashire, England                      | Research Nurse                                          | Research Site                                                                              |
| Gopal                                     | Anand Iyer        |                              | MBBS             | Royal Liverpool Hospital            | Liverpool, England                       | Co-Investigator                                         | Research Site                                                                              |
| Prematie                                  | Andreou           |                              | BSc(Hons)        | Leicester Royal Infirmary           | Leicester, England                       | Research Nurse                                          | Research Site                                                                              |
| Gillian                                   | Andrew            |                              | BSc              | Edinburgh Royal Infirmary           | Edinburgh, Scotland                      | Research Nurse                                          | Research Site                                                                              |
| Ian                                       | Angus             |                              | DipHE            | Royal Oldham Hospital               | Manchester, England                      | Research Nurse                                          | Research Site                                                                              |
| Gill                                      | Arbane            |                              |                  | St Thomas's Hospital                | London, England                          | Research Service Manager                                | Research Site                                                                              |
| Pauline                                   | Austin            |                              | MBChB            | Ninewells Hospital                  | Dundee, Scotland                         | Co-Investigator                                         | Research Site                                                                              |
| Karen                                     | Austin            |                              | RGN              | Worcester Hospital                  | Worcestershire, England                  | Research Nurse                                          | Research Site                                                                              |
| Georg                                     | Auzinger          |                              | Reader           | King's College London               | London, England                          | Principal Investigator                                  | Research Site                                                                              |
| Jonathan                                  | Ball              |                              | MD               | St George's Hospital                | London, England                          | Co-Investigator                                         | Research Site                                                                              |
| Dorota                                    | Banach            |                              | MSc              | Charing Cross & Hammersmith         | London, England                          | Research Nurse                                          | Research Site                                                                              |
| Jonathan                                  | Bannard-Smith     |                              | MB               | Manchester Royal Infirmary          | Manchester, England                      | Principal Investigator                                  | Research Site                                                                              |
| Leona                                     | Bannon            |                              | BSc              | Royal Hospitals                     | Belfast, Northern Ireland                | Research Nurse                                          | Research Site                                                                              |
| Lucy                                      | Barclay           |                              | BSc              | Edinburgh Royal Infirmary           | Edinburgh, Scotland                      | Research Nurse                                          | Research Site                                                                              |
| Helena                                    | Barcraft-Barnes   |                              | BSc(Hons)        | Poole Hospital                      | Dorset, England                          | Research Nurse                                          | Research Site                                                                              |
| Richard                                   | Beale             |                              | MBBS             | St Thomas's Hospital                | London, England                          | Co-Investigator                                         | Research Site                                                                              |
| Sarah                                     | Bean              |                              | BA Hons          | Royal Cornwall Hospital             | Cornwall, England                        | Research Nurse                                          | Research Site                                                                              |
| Andrew                                    | Bentley           |                              | MD               | Wythenshawe Hospital                | Manchester, England                      | Principal Investigator                                  | Research Site                                                                              |
| Georgia                                   | Bercades          |                              | MSc              | University College Hospital         | London, England                          | Research Nurse                                          | Research Site                                                                              |
| Colin                                     | Bergin            |                              | BSc              | Birmingham Queen Elizabeth Hospital | Birmingham, England                      | Research Nurse                                          | Research Site                                                                              |
| Sian                                      | Bhardwaj          |                              | FRCA             | Worcester Hospital                  | Worcestershire, England                  | Principal Investigator                                  | Research Site                                                                              |
| Colin                                     | Bigham            |                              | MBBS             | Derriford Hospital                  | Plymouth, England                        | Principal Investigator                                  | Research Site                                                                              |
| Isobel                                    | Birkinshaw        |                              | BSc              | York Teaching Hospital              | York, England                            | Research Nurse                                          | Research Site                                                                              |

## Supplemental Online Content: Nonauthor Collaborators

\*Indicates required information. Only first name, last name, and suffix will appear in PubMed.

| *First Name and Middle Initial(s) | *Last Name        | *Suffix (eg, Jr, III) | Academic Degrees | Institution                         | Location (city, state/province, country) | Role or Contribution, eg, chair, principal investigator | Group (if more than 1 Group listed in the byline) and/or Subgroup (eg, Steering Committee) |
|-----------------------------------|-------------------|-----------------------|------------------|-------------------------------------|------------------------------------------|---------------------------------------------------------|--------------------------------------------------------------------------------------------|
| Euan                              | Black             |                       | FRCA             | Glasgow Queen Elizabeth             | Glasgow, Scotland                        | Co-Investigator                                         | Research Site                                                                              |
| Aneta                             | Bociek            |                       | BSc(Hons)        | St Thomas's Hospital                | London, England                          | Research Nurse                                          | Research Site                                                                              |
| Andrew                            | Bodenham          |                       | MBBS             | Leeds General Hospital              | Leeds, England                           | Co-Investigator                                         | Research Site                                                                              |
| Malcolm G                         | Booth             |                       | MBChB            | Glasgow Royal Infirmary             | Glasgow, Scotland                        | Co-Investigator                                         | Research Site                                                                              |
| Christine                         | Bowyer            |                       | RGN              | Wythenshawe Hospital                | Manchester, England                      | Research Nurse                                          | Research Site                                                                              |
| David A                           | Brealey           |                       | PhD              | University College Hospital         | London, England                          | Co-Investigator                                         | Research Site                                                                              |
| Stephen                           | Brett             |                       | MD               | Charing Cross & Hammersmith         | London, England                          | Principal Investigator                                  | Research Site                                                                              |
| Jennifer                          | Brooks            |                       | BN               | University of Wales Hospital        | Cardiff, Wales                           | Research Nurse                                          | Research Site                                                                              |
| Karen                             | Burt              |                       | RGN              | Royal Cornwall Hospital             | Cornwall, England                        | Research Nurse                                          | Research Site                                                                              |
| Louise                            | Cabrelli          |                       | BN               | Ninewells Hospital                  | Dundee, Scotland                         | Research Nurse                                          | Research Site                                                                              |
| Leilani                           | Cabreros          |                       | BSc              | Charing Cross & Hammersmith         | London, England                          | Research Nurse                                          | Research Site                                                                              |
| Hazel                             | Cahill            |                       | DipHE            | York Teaching Hospital              | York, England                            | Research Nurse                                          | Research Site                                                                              |
| Aidan                             | Campbell          |                       | FCAI             | Altnagelvin Hospital                | Derry, Northern Ireland                  | Co-Investigator                                         | Research Site                                                                              |
| Luigi                             | Camporota         |                       | PhD              | St Thomas's Hospital                | London, England                          | Principal Investigator                                  | Research Site                                                                              |
| Sara                              | Campos            |                       | RGN              | St Thomas's Hospital                | London, England                          | Research Nurse                                          | Research Site                                                                              |
| Julie                             | Camsooksai        |                       | BSc(Hons)        | Poole Hospital                      | Dorset, England                          | Senior Research Nurse                                   | Research Site                                                                              |
| Ronald                            | Carrera           |                       | BSc              | Birmingham Queen Elizabeth Hospital | Birmingham, England                      | Research Nurse                                          | Research Site                                                                              |
| Joseph                            | Carter            |                       | MB               | York Teaching Hospital              | York, England                            | Principal Investigator                                  | Research Site                                                                              |
| Jaime                             | Carungcong        |                       | BS               | Chelsea & Westminster               | London, England                          | Research Nurse                                          | Research Site                                                                              |
| Anelise                           | Catelan-Zborowski |                       | BSc              | Royal Brompton Hospital             | London, England                          | Research Nurse                                          | Research Site                                                                              |
| Susanne                           | Cathcart          |                       | BN               | Glasgow Royal Infirmary             | Glasgow, Scotland                        | Research Nurse                                          | Research Site                                                                              |
| Shreekant                         | Champanerkar      |                       | MBBS             | Royal Gwent Hospital                | Newport, Wales                           | Co-Investigator                                         | Research Site                                                                              |
| Matthew                           | Charlton          |                       | MB               | Leicester Royal Infirmary           | Leicester, England                       | Co-Investigator                                         | Research Site                                                                              |
| Shiney                            | Cherian           |                       | BSc(Hons)        | Royal Gwent Hospital                | Newport, Wales                           | Research Nurse                                          | Research Site                                                                              |
| Linsey                            | Christie          |                       | MSc              | Chelsea & Westminster               | London, England                          | Co-Investigator                                         | Research Site                                                                              |
| Srikanth                          | Chukkambotla      |                       | FRCA             | Royal Blackburn Hospital            | Lancashire, England                      | Principal Investigator                                  | Research Site                                                                              |
| Amy                               | Clark             |                       | BSc              | Birmingham Queen Elizabeth Hospital | Birmingham, England                      | Research Nurse                                          | Research Site                                                                              |

## Supplemental Online Content: Nonauthor Collaborators

\*Indicates required information. Only first name, last name, and suffix will appear in PubMed.

| *First Name and Middle Initial(s) | *Last Name    | *Suffix (eg, Jr, III) | Academic Degrees | Institution                         | Location (city, state/province, country) | Role or Contribution, eg, chair, principal investigator | Group (if more than 1 Group listed in the byline and/or Subgroup (eg, Steering Committee)) |
|-----------------------------------|---------------|-----------------------|------------------|-------------------------------------|------------------------------------------|---------------------------------------------------------|--------------------------------------------------------------------------------------------|
| Sarah                             | Clark         |                       | Mnurs            | Edinburgh Royal Infirmary           | Edinburgh, Scotland                      | Research Nurse                                          | Research Site                                                                              |
| Richard                           | Clark         |                       | Dip.He           | Manchester Royal Infirmary          | Manchester, England                      | Research Nurse                                          | Research Site                                                                              |
| Ian                               | Clement       |                       | D.Phil           | Royal Victoria Infirmary            | Newcastle upon Tyne, England             | Principal Investigator                                  | Research Site                                                                              |
| Eve                               | Cocks         |                       | Dip              | University of Wales Hospital        | Cardiff, Wales                           | Research Nurse                                          | Research Site                                                                              |
| Stephen                           | Cole          |                       | BSc(Hons)        | Ninewells Hospital                  | Dundee, Scotland                         | Principal Investigator                                  | Research Site                                                                              |
| Sonia                             | Cole          |                       | MSc              | Sandwell General Hospital           | Birmingham, England                      | Research Nurse                                          | Research Site                                                                              |
| Jade                              | Cole          |                       | BSc              | University of Wales Hospital        | Cardiff, Wales                           | Research Nurse                                          | Research Site                                                                              |
| Nick                              | Coleman       |                       | FRCA             | Royal Stoke Hospital                | Stoke-on-Trent, England                  | Co-Investigator                                         | Research Site                                                                              |
| Emma                              | Connaughton   |                       | BSc              | Manchester Royal Infirmary          | Manchester, England                      | Research Nurse                                          | Research Site                                                                              |
| Andrew                            | Conway Morris |                       | PhD              | Addenbrookes Hospital               | Cambridge, England                       | Co-Investigator                                         | Research Site                                                                              |
| Lauren                            | Cooper        |                       | MSc              | Birmingham Queen Elizabeth Hospital | Birmingham, England                      | Trial Co-ordinator                                      | Research Site                                                                              |
| Ian                               | Cooper        |                       | BSc(Hons)        | Royal Oldham Hospital               | Manchester, England                      | Research Nurse                                          | Research Site                                                                              |
| Carolyn                           | Corbett       |                       | RGN Dip          | Royal Oldham Hospital               | Manchester, England                      | Research Nurse                                          | Research Site                                                                              |
| Sarah                             | Cornell       |                       | BSc(Hons)        | Sunderland Royal Hospital           | Tyne and Wear, England                   | Research Nurse                                          | Research Site                                                                              |
| Carmen                            | Correia       |                       | BSc(Hons)        | Royal London Hospital               | London, England                          | Research Nurse                                          | Research Site                                                                              |
| Victoria                          | Cottam        |                       | BSc(Hons)        | New Cross Hospital                  | Wolverhampton, England                   | Research Nurse                                          | Research Site                                                                              |
| Keith                             | Couper        |                       | PhD              | Birmingham Heartlands Hospital      | Birmingham, England                      | Research Nurse                                          | Research Site                                                                              |
| Laura                             | Creighton     |                       | BSc              | Royal Hospitals                     | Belfast, Northern Ireland                | Research Nurse                                          | Research Site                                                                              |
| Maryam                            | Crews         |                       | MBCbB            | Royal Liverpool Hospital            | Liverpool, England                       | Co-Investigator                                         | Research Site                                                                              |
| Neil                              | Crooks        |                       | MD               | Birmingham Heartlands Hospital      | Birmingham, England                      | Co-Investigator                                         | Research Site                                                                              |
| Jacqueline                        | Curtin        |                       | Dip              | University of Wales Hospital        | Cardiff, Wales                           | Research Nurse                                          | Research Site                                                                              |
| Zoe                               | Daly          |                       | BSc              | Queen Alexandra Hospital            | Portsmouth, England                      | Research Nurse                                          | Research Site                                                                              |
| Alan                              | Davidson      |                       | FRCA             | Glasgow Queen Elizabeth             | Glasgow, Scotland                        | Co-Investigator                                         | Research Site                                                                              |
| Rhys                              | Davies        |                       | BSc              | University of Wales Hospital        | Cardiff, Wales                           | Research Nurse                                          | Research Site                                                                              |
| Michelle                          | Davies        |                       | BN               | University of Wales Hospital        | Cardiff, Wales                           | Research Nurse                                          | Research Site                                                                              |
| Christopher                       | Day           |                       | Dip              | Royal Devon and Exeter Hospital     | Devon, England                           | Principal Investigator                                  | Research Site                                                                              |
| Mike                              | Dean          |                       | MBBS             | Northwick Park Hospital             | London, England                          | Principal Investigator                                  | Research Site                                                                              |

## Supplemental Online Content: Nonauthor Collaborators

\*Indicates required information. Only first name, last name, and suffix will appear in PubMed.

| *First Name and Middle Initial(s) | *Last Name | *Suffix (eg, Jr, III) | Academic Degrees | Institution                         | Location (city, state/province, country) | Role or Contribution, eg, chair, principal investigator | Group (if more than 1 Group listed in the byline) and/or Subgroup (eg, Steering Committee) |
|-----------------------------------|------------|-----------------------|------------------|-------------------------------------|------------------------------------------|---------------------------------------------------------|--------------------------------------------------------------------------------------------|
| Ged                               | Dempsey    |                       | MD               | Aintree Hospital                    | Liverpool, England                       | Principal Investigator                                  | Research Site                                                                              |
| Anna                              | Dennis     |                       | MB               | Birmingham Heartlands Hospital      | Birmingham, England                      | Co-Investigator                                         | Research Site                                                                              |
| Susan                             | Dermody    |                       | Dip              | Royal Oldham Hospital               | Manchester, England                      | Research Nurse                                          | Research Site                                                                              |
| Liesl                             | Despy      |                       | MSc              | Birmingham Queen Elizabeth Hospital | Birmingham, England                      | Research Nurse                                          | Research Site                                                                              |
| Murugesh                          | Devaramani |                       | BSc              | Manchester Royal Infirmary          | Manchester, England                      | Research Nurse                                          | Research Site                                                                              |
| Patricia                          | Doble      |                       | BSc(Hons)        | Musgrove Park Hospital              | Somerset, England                        | Research Nurse                                          | Research Site                                                                              |
| Robert                            | Docking    |                       | FICM             | Glasgow Queen Elizabeth             | Glasgow, Scotland                        | Co-Investigator                                         | Research Site                                                                              |
| Adrian                            | Donnelly   |                       | FCARCSI          | Altnagelvin Hospital                | Derry, Northern Ireland                  | Co-Investigator                                         | Research Site                                                                              |
| Natalie                           | Dooley     |                       | BSc              | Birmingham Queen Elizabeth Hospital | Birmingham, England                      | Research Nurse                                          | Research Site                                                                              |
| Natalie                           | Dormand    |                       | MIET             | Royal Brompton Hospital             | London, England                          | Research Manager                                        | Research Site                                                                              |
| Andrew                            | Drummond   |                       | FFICM            | Royal Oldham Hospital               | Manchester, England                      | Co-Investigator                                         | Research Site                                                                              |
| Mark JG                           | Dunn       |                       | MB               | Edinburgh Royal Infirmary           | Edinburgh, Scotland                      | Co-Investigator                                         | Research Site                                                                              |
| Leigh                             | Dunn       |                       | BSc              | Royal Victoria Infirmary            | Newcastle upon Tyne, England             | Research Nurse                                          | Research Site                                                                              |
| Christine                         | Eastgate   |                       | BSc              | Royal Free Hospital                 | London, England                          | Research Nurse                                          | Research Site                                                                              |
| Karen                             | Ellis      |                       | BSc(Hons)        | Birmingham Queen Elizabeth Hospital | Birmingham, England                      | Research Nurse                                          | Research Site                                                                              |
| Sarah                             | Farnell    |                       | MSc              | St George's Hospital                | London, England                          | Research Nurse                                          | Research Site                                                                              |
| Helen                             | Farrah     |                       | MSc              | St George's Hospital                | London, England                          | Research Nurse                                          | Research Site                                                                              |
| Emma                              | Fellows    |                       | BSc              | Birmingham Queen Elizabeth Hospital | Birmingham, England                      | Research Nurse                                          | Research Site                                                                              |
| Timothy                           | Felton     |                       | PhD              | Wythenshawe Hospital                | Manchester, England                      | Co-Investigator                                         | Research Site                                                                              |
| Helder                            | Filipe     |                       | BSc              | Royal Free Hospital                 | London, England                          | Research Nurse                                          | Research Site                                                                              |
| Clare                             | Finney     |                       | BSc(Hons)        | King's College London               | London, England                          | Research Nurse                                          | Research Site                                                                              |
| Simon                             | Finney     |                       | PhD              | Royal Brompton Hospital             | London, England                          | Co-Investigator                                         | Research Site                                                                              |
| Jillian                           | Fitchett   |                       | DipHE            | Royal Blackburn Hospital            | Lancashire, England                      | Research Nurse                                          | Research Site                                                                              |
| Brian                             | Gammon     |                       | PhD              | Sandwell General Hospital           | Birmingham, England                      | Research Nurse                                          | Research Site                                                                              |
| Saibal                            | Ganguly    |                       | FFICM            | New Cross Hospital                  | Wolverhampton, England                   | Co-Investigator                                         | Research Site                                                                              |

## Supplemental Online Content: Nonauthor Collaborators

\*Indicates required information. Only first name, last name, and suffix will appear in PubMed.

| *First Name and Middle Initial(s) | *Last Name      | *Suffix (eg, Jr, III) | Academic Degrees | Institution                         | Location (city, state/province, country) | Role or Contribution, eg, chair, principal investigator | Group (if more than 1 Group listed in the byline) and/or Subgroup (eg, Steering Committee) |
|-----------------------------------|-----------------|-----------------------|------------------|-------------------------------------|------------------------------------------|---------------------------------------------------------|--------------------------------------------------------------------------------------------|
| Minerva                           | Gellamucho      |                       | BSN RGN          | Royal Stoke Hospital                | Stoke-on-Trent, England                  | Research Nurse                                          | Research Site                                                                              |
| Susan                             | Gibson          |                       | RGN              | Ninewells Hospital                  | Dundee, Scotland                         | Research Nurse                                          | Research Site                                                                              |
| Charles                           | Gibson          |                       | MBChB            | Royal Devon and Exeter Hospital     | Devon, England                           | Co-Investigator                                         | Research Site                                                                              |
| Lynn                              | Gilfeather      |                       | FFARCSI          | Altnagelvin Hospital                | Derry, Northern Ireland                  | Principal Investigator                                  | Research Site                                                                              |
| Michael A                         | Gillies         |                       | MD               | Edinburgh Royal Infirmary           | Edinburgh, Scotland                      | Principal Investigator                                  | Research Site                                                                              |
| Stuart                            | Gillon          |                       | FFICM            | Glasgow Queen Elizabeth             | Glasgow, Scotland                        | Co-Investigator                                         | Research Site                                                                              |
| Shameer                           | Gopal           |                       | FFICM            | New Cross Hospital                  | Wolverhampton, England                   | Principal Investigator                                  | Research Site                                                                              |
| Anthony                           | Gordon          |                       | MD               | Imperial College                    | London, England                          | Co-Investigator                                         | Research Site                                                                              |
| Stephanie                         | Goundry         |                       | MSc              | Birmingham Queen Elizabeth Hospital | Birmingham, England                      | Research Nurse                                          | Research Site                                                                              |
| Lia                               | Grainger        |                       | DipHe            | York Teaching Hospital              | York, England                            | Research Nurse                                          | Research Site                                                                              |
| Neus                              | Grau Novellas   |                       | PGDip            | St Thomas's Hospital                | London, England                          | Research Nurse                                          | Research Site                                                                              |
| Joanne                            | Gresty          |                       | BSc(Hons)        | Birmingham Heartlands Hospital      | Birmingham, England                      | Research Nurse                                          | Research Site                                                                              |
| Mark                              | Griffiths       |                       | PhD              | St Bartholomews                     | London, England                          | Co-Investigator                                         | Research Site                                                                              |
| Jamie                             | Gross           |                       | MBBS             | Northwick Park Hospital             | London, England                          | Co-Investigator                                         | Research Site                                                                              |
| Una                               | Gunter          |                       | DN               | Royal Gwent Hospital                | Newport, Wales                           | Research Nurse                                          | Research Site                                                                              |
| Karen                             | Hallett         |                       | BSc(Hons)        | Royal Oldham Hospital               | Manchester, England                      | Research Nurse                                          | Research Site                                                                              |
| Samantha                          | Harkett         |                       | BSc              | Birmingham Queen Elizabeth Hospital | Birmingham, England                      | Research Nurse                                          | Research Site                                                                              |
| Donna                             | Harrison-Briggs |                       | PGCert           | Royal Blackburn Hospital            | Lancashire, England                      | Research Nurse                                          | Research Site                                                                              |
| Louise                            | Hartley         |                       | FFICM            | Glasgow Queen Elizabeth             | Glasgow, Scotland                        | Co-Investigator                                         | Research Site                                                                              |
| Ingrid                            | Hass            |                       | Msc              | University College Hospital         | London, England                          | Research Nurse                                          | Research Site                                                                              |
| Noel                              | Hemmings        |                       | MSc              | Altnagelvin Hospital                | Derry, Northern Ireland                  | Co-Investigator                                         | Research Site                                                                              |
| Steven                            | Henderson       |                       | MPH              | Glasgow Queen Elizabeth             | Glasgow, Scotland                        | Research Nurse                                          | Research Site                                                                              |
| Helen                             | Hill            |                       | BSc              | University of Wales Hospital        | Cardiff, Wales                           | Research Nurse                                          | Research Site                                                                              |
| Gemma                             | Hodkinson       |                       | BSc(Hons)        | Royal Gwent Hospital                | Newport, Wales                           | Research Nurse                                          | Research Site                                                                              |
| Kate                              | Howard          |                       | MSc              | York Teaching Hospital              | York, England                            | Research Nurse                                          | Research Site                                                                              |
| Clare                             | Howcroft        |                       | BSc(Hons)        | St James Hospital                   | Leeds, England                           | Research Nurse                                          | Research Site                                                                              |
| Ying                              | Hu              |                       | BSc(Hons)        | Royal London Hospital               | London, England                          | Research Nurse                                          | Research Site                                                                              |

## Supplemental Online Content: Nonauthor Collaborators

\*Indicates required information. Only first name, last name, and suffix will appear in PubMed.

| *First Name and Middle Initial(s) | *Last Name    | *Suffix (eg, Jr, III) | Academic Degrees | Institution                         | Location (city, state/province, country) | Role or Contribution, eg, chair, principal investigator | Group (if more than 1 Group listed in the byline) and/or Subgroup (eg, Steering Committee) |
|-----------------------------------|---------------|-----------------------|------------------|-------------------------------------|------------------------------------------|---------------------------------------------------------|--------------------------------------------------------------------------------------------|
| Jonathan                          | Hulme         |                       | FRCA             | Sandwell General Hospital           | Birmingham, England                      | Principal Investigator                                  | Research Site                                                                              |
| Tariq                             | Husain        |                       | MBBS             | Northwick Park Hospital             | London, England                          | Co-Investigator                                         | Research Site                                                                              |
| Joanne                            | Hutter        |                       | DipHE            | Musgrove Park Hospital              | Somerset, England                        | Research Nurse                                          | Research Site                                                                              |
| Dorothy                           | Ilano         |                       | BSc(Hons)        | University College Hospital         | London, England                          | Staff Nurse                                             | Research Site                                                                              |
| Richard                           | Innes         |                       | MBBCH            | Musgrove Park Hospital              | Somerset, England                        | Principal Investigator                                  | Research Site                                                                              |
| Nicola                            | Jacques       |                       | MSc              | Royal Berkshire Hospital            | Reading, England                         | Research Lead Nurse                                     | Research Site                                                                              |
| Sarah                             | James         |                       | BSc              | Royal Free Hospital                 | London, England                          | Research Nurse                                          | Research Site                                                                              |
| Sarah                             | Jenkins       |                       | BSc(Hons)        | Poole Hospital                      | Dorset, England                          | Research Nurse                                          | Research Site                                                                              |
| Paul                              | Johnston      |                       | MB               | Antrim Area Hospital                | Antrim, Northern Ireland                 | Principal Investigator                                  | Research Site                                                                              |
| Brian                             | Johnston      |                       | MBBS             | Royal Liverpool Hospital            | Liverpool, England                       | Co-Investigator                                         | Research Site                                                                              |
| Colette                           | Jones-Criddle |                       | Dip HE           | Aintree Hospital                    | Liverpool, England                       | Research Sister                                         | Research Site                                                                              |
| Santhana                          | Kannan        |                       | FRCA             | Sandwell General Hospital           | Birmingham, England                      | Co-Investigator                                         | Research Site                                                                              |
| Parminder                         | Kaur Bhuie    |                       | RGN              | Royal Berkshire Hospital            | Reading, England                         | Research Nurse                                          | Research Site                                                                              |
| Andrea                            | Kelly         |                       | BSc(Hons)        | St Thomas's Hospital                | London, England                          | Research Nurse                                          | Research Site                                                                              |
| Sophie                            | Kennedy-Hay   |                       | BN               | Glasgow Queen Elizabeth             | Glasgow, Scotland                        | Research Nurse                                          | Research Site                                                                              |
| Liana                             | Lankester     |                       | PGCert           | Derriford Hospital                  | Plymouth, England                        | Research Nurse                                          | Research Site                                                                              |
| Susannah                          | Leaver        |                       | PhD              | St George's Hospital                | London, England                          | Principal Investigator                                  | Research Site                                                                              |
| Stephane                          | Ledot         |                       | MD               | Royal Brompton Hospital             | London, England                          | Principal Investigator                                  | Research Site                                                                              |
| Rosario                           | Lim           |                       | BSN              | St Thomas's Hospital                | London, England                          | Research Nurse                                          | Research Site                                                                              |
| Lucie                             | Linhartova    |                       | MB               | Birmingham Heartlands Hospital      | Birmingham, England                      | Co-Investigator                                         | Research Site                                                                              |
| Fei                               | Long          |                       | MSc              | Northwick Park Hospital             | London, England                          | Research Nurse                                          | Research Site                                                                              |
| Niall S                           | MacCallum     |                       | PhD              | University College Hospital         | London, England                          | Principal Investigator                                  | Research Site                                                                              |
| Sarah                             | MacGill       |                       | BSc              | Royal Berkshire Hospital            | Reading, England                         | Research Nurse                                          | Research Site                                                                              |
| Andrew                            | Mackay        |                       | FRCA             | Glasgow Queen Elizabeth             | Glasgow, Scotland                        | Co-Investigator                                         | Research Site                                                                              |
| Sarah                             | Maclean       |                       | MBChB            | Ninewells Hospital                  | Dundee, Scotland                         | Co-Investigator                                         | Research Site                                                                              |
| Amber                             | Markham       |                       | MSc              | Sandwell General Hospital           | Birmingham, England                      | Matron                                                  | Research Site                                                                              |
| Daniel                            | Martin        |                       | OBE              | Royal Free Hospital                 | London, England                          | Principal Investigator                                  | Research Site                                                                              |
| Tim                               | Martin        |                       | RGN              | Royal London Hospital               | London, England                          | Research Nurse                                          | Research Site                                                                              |
| Tracy                             | Mason         |                       | BSc              | Birmingham Queen Elizabeth Hospital | Birmingham, England                      | Research Nurse                                          | Research Site                                                                              |

## Supplemental Online Content: Nonauthor Collaborators

\*Indicates required information. Only first name, last name, and suffix will appear in PubMed.

| *First Name and Middle Initial(s) | *Last Name    | *Suffix (eg, Jr, III) | Academic Degrees     | Institution                         | Location (city, state/province, country) | Role or Contribution, eg, chair, principal investigator | Group (if more than 1 Group listed in the byline) and/or Subgroup (eg, Steering Committee) |
|-----------------------------------|---------------|-----------------------|----------------------|-------------------------------------|------------------------------------------|---------------------------------------------------------|--------------------------------------------------------------------------------------------|
| Nick                              | Mason         |                       | PhD                  | Royal Gwent Hospital                | Newport, Wales                           | Co-Investigator                                         | Research Site                                                                              |
| Justine                           | McCann        |                       | BSc                  | Royal Hospitals                     | Belfast, Northern Ireland                | Research Nurse                                          | Research Site                                                                              |
| Corrienne                         | McCulloch     |                       | PhD                  | Edinburgh Royal Infirmary           | Edinburgh, Scotland                      | Research Nurse                                          | Research Site                                                                              |
| Christopher                       | McGhee        |                       | BSc                  | Birmingham Queen Elizabeth Hospital | Birmingham, England                      | Research Nurse                                          | Research Site                                                                              |
| Loren                             | McGinley-Keag |                       | BSc                  | Royal Hospitals                     | Belfast, Northern Ireland                | Research Nurse                                          | Research Site                                                                              |
| Michael                           | McLaughlin    |                       | MChB                 | Glasgow Royal Infirmary             | Glasgow, Scotland                        | Co-Investigator                                         | Research Site                                                                              |
| Lia                               | McNamee       |                       | MMS                  | Royal Hospitals                     | Belfast, Northern Ireland                | Research Physician Associate                            | Research Site                                                                              |
| Margaret                          | McNeil        |                       | MNursSci             | Royal Free Hospital                 | London, England                          | Research Nurse                                          | Research Site                                                                              |
| Laura                             | Mee           |                       |                      | Birmingham Queen Elizabeth Hospital | Birmingham, England                      | Research Administrator                                  | Research Site                                                                              |
| Claire                            | Mellis        |                       | BSc(Hons), DIPHE, RN | King's College London               | London, England                          | Research Nurse                                          | Research Site                                                                              |
| Teresa                            | Melody        |                       | MSc                  | Birmingham Heartlands Hospital      | Birmingham, England                      | Research Manager                                        | Research Site                                                                              |
| Jeanette                          | Mills         |                       | BSc                  | Royal Hospitals                     | Belfast, Northern Ireland                | Research Nurse                                          | Research Site                                                                              |
| Esther                            | Molina        |                       | BSc                  | Leicester Royal Infirmary           | Leicester, England                       | Research Nurse                                          | Research Site                                                                              |
| Matt PG                           | Morgan        |                       | PhD                  | University of Wales Hospital        | Cardiff, Wales                           | Principal Investigator                                  | Research Site                                                                              |
| Mushiya                           | Mpelembue     |                       | MSc                  | Northwick Park Hospital             | London, England                          | Research Co-ordinator                                   | Research Site                                                                              |
| Stephanie                         | Muldoon       |                       | BSc                  | Birmingham Queen Elizabeth Hospital | Birmingham, England                      | Research Nurse                                          | Research Site                                                                              |
| Sheila                            | Munt          |                       | SRN Dip              | Royal Oldham Hospital               | Manchester, England                      | Research Nurse                                          | Research Site                                                                              |
| Nazril                            | Nordin        |                       | MBBS                 | Watford General Hospital            | Watford, England                         | Co-Investigator                                         | Research Site                                                                              |
| Christopher                       | Nutt          |                       | MB                   | Royal Hospitals                     | Belfast, Northern Ireland                | Co-Investigator                                         | Research Site                                                                              |
| Sinead                            | O'Kane        |                       | BSc(Hons)            | Altnagelvin Hospital                | Derry, Northern Ireland                  | Research Nurse                                          | Research Site                                                                              |

## Supplemental Online Content: Nonauthor Collaborators

\*Indicates required information. Only first name, last name, and suffix will appear in PubMed.

| *First Name and Middle Initial(s) | *Last Name  | *Suffix (eg, Jr, III) | Academic Degrees | Institution                         | Location (city, state/province, country) | Role or Contribution, eg, chair, principal investigator | Group (if more than 1 Group listed in the byline) and/or Subgroup (eg, Steering Committee) |
|-----------------------------------|-------------|-----------------------|------------------|-------------------------------------|------------------------------------------|---------------------------------------------------------|--------------------------------------------------------------------------------------------|
| Aisling                           | O'Neill     |                       | BSc              | Royal Hospitals                     | Belfast, Northern Ireland                | Research Nurse                                          | Research Site                                                                              |
| Valerie                           | Page        |                       | MB               | Watford General Hospital            | Watford, England                         | Principal Investigator                                  | Research Site                                                                              |
| Elankumaran                       | Paramasivam |                       | FRCP             | St James Hospital                   | Leeds, England                           | Principal Investigator                                  | Research Site                                                                              |
| Dhruv                             | Parekh      |                       | PhD              | Birmingham Queen Elizabeth Hospital | Birmingham, England                      | Co-Investigator                                         | Research Site                                                                              |
| Sarah                             | Patch       |                       | BSc(Hons)        | Poole Hospital                      | Dorset, England                          | Research Nurse                                          | Research Site                                                                              |
| Sameer                            | Patel       |                       | MBBS             | King's College London               | London, England                          | Co-Investigator                                         | Research Site                                                                              |
| Lia                               | Paton       |                       | MBChB (Hons)     | Glasgow Royal Infirmary             | Glasgow, Scotland                        | Co-Investigator                                         | Research Site                                                                              |
| Gavin                             | Perkins     |                       |                  | Birmingham Heartlands Hospital      | Birmingham, England                      | Principal Investigator                                  | Research Site                                                                              |
| Manuel                            | Pinto       |                       | BSc              | Royal Free Hospital                 | London, England                          | Research Nurse                                          | Research Site                                                                              |
| David                             | Pogson      |                       | MSc              | Queen Alexandra Hospital            | Portsmouth, England                      | Co-Investigator                                         | Research Site                                                                              |
| Petra                             | Polgarova   |                       | MSC              | Addenbrookes Hospital               | Cambridge, England                       | Research Nurse                                          | Research Site                                                                              |
| Jagtar                            | Pooni       |                       | FFICM            | New Cross Hospital                  | Wolverhampton, England                   | Co-Investigator                                         | Research Site                                                                              |
| Martin                            | Pope        |                       |                  | Birmingham Queen Elizabeth Hospital | Birmingham, England                      | Clinical Trials Assistant                               | Research Site                                                                              |
| Grant C                           | Price       |                       | MB               | Edinburgh Royal Infirmary           | Edinburgh, Scotland                      | Co-Investigator                                         | Research Site                                                                              |
| Jashmin                           | Priya Maria |                       | MSc              | Manchester Royal Infirmary          | Manchester, England                      | Research Nurse                                          | Research Site                                                                              |
| Lynda                             | Purdy       |                       | BSc              | Royal Hospitals                     | Belfast, Northern Ireland                | Research Nurse                                          | Research Site                                                                              |
| Alex                              | Puxty       |                       | MBChB            | Glasgow Royal Infirmary             | Glasgow, Scotland                        | Principal Investigator                                  | Research Site                                                                              |
| John                              | Rae         |                       | MBChB            | Ninewells Hospital                  | Dundee, Scotland                         | Co-Investigator                                         | Research Site                                                                              |
| Mark                              | Raper       |                       | MBBS             | University of Wales Hospital        | Cardiff, Wales                           | Co-Investigator                                         | Research Site                                                                              |
| Henrik                            | Reschreiter |                       | FFICM            | Poole Hospital                      | Dorset, England                          | Principal Investigator                                  | Research Site                                                                              |
| Steve                             | Rose        |                       | BSc              | Queen Alexandra Hospital            | Portsmouth, England                      | Research Nurse                                          | Research Site                                                                              |
| Anthony                           | Rostron     |                       | PhD              | Sunderland Royal Hospital           | Tyne and Wear, England                   | Co-Investigator                                         | Research Site                                                                              |
| Alistair                          | Roy         |                       | MBChB            | Sunderland Royal Hospital           | Tyne and Wear, England                   | Principal Investigator                                  | Research Site                                                                              |
| Christine                         | Ryan        |                       | MSc              | St George's Hospital                | London, England                          | Research Nurse                                          | Research Site                                                                              |
| Jung                              | Ryu         |                       | MSc              | University College Hospital         | London, England                          | Study Co-ordinator                                      | Research Site                                                                              |



## Supplemental Online Content: Nonauthor Collaborators

\*Indicates required information. Only first name, last name, and suffix will appear in PubMed.

| *First Name and Middle Initial(s) | *Last Name   | *Suffix (eg, Jr, III) | Academic Degrees | Institution                         | Location (city, state/province, country) | Role or Contribution, eg, chair, principal investigator | Group (if more than 1 Group listed in the byline) and/or Subgroup (eg, Steering Committee) |
|-----------------------------------|--------------|-----------------------|------------------|-------------------------------------|------------------------------------------|---------------------------------------------------------|--------------------------------------------------------------------------------------------|
| Kiran                             | Salaunkey    |                       | MBBS             | Papworth Hospital                   | Cambridge, England                       | Principal Investigator                                  | Research Site                                                                              |
| Julia                             | Sampson      |                       | BSc(Hons)        | Birmingham Heartlands Hospital      | Birmingham, England                      | Research Nurse                                          | Research Site                                                                              |
| Vivian                            | Sathianathan |                       | MBBS             | Northwick Park Hospital             | London, England                          | Co-Investigator                                         | Research Site                                                                              |
| Lorraine                          | Scaife       |                       | RGN              | Royal Devon and Exeter Hospital     | Devon, England                           | Senior Research Nurse                                   | Research Site                                                                              |
| Simon WM                          | Scott        |                       | MD               | Leicester Royal Infirmary           | Leicester, England                       | Principal Investigator                                  | Research Site                                                                              |
| Timothy E                         | Scott        |                       | PhD              | Royal Stoke Hospital                | Stoke-on-Trent, England                  | Principal Investigator                                  | Research Site                                                                              |
| Sumant                            | Shanbhag     |                       | MBBS             | Manor Hospital                      | Walsall, England                         | Principal Investigator                                  | Research Site                                                                              |
| David                             | Shaw         |                       | DipHE            | Royal Liverpool Hospital            | Liverpool, England                       | Research Nurse                                          | Research Site                                                                              |
| Malcolm                           | Sim          |                       | MD               | Glasgow Queen Elizabeth             | Glasgow, Scotland                        | Principal Investigator                                  | Research Site                                                                              |
| Suveer                            | Singh        |                       | MD               | Chelsea & Westminster               | London, England                          | Principal Investigator                                  | Research Site                                                                              |
| Andrew                            | Smallwood    |                       | MSc              | New Cross Hospital                  | Wolverhampton, England                   | Research Nurse                                          | Research Site                                                                              |
| Hazel                             | Smith        |                       | MSc              | Birmingham Queen Elizabeth Hospital | Birmingham, England                      | Research Paramedic                                      | Research Site                                                                              |
| John                              | Smith        |                       | ACET             | King's College London               | London, England                          | Senior Research Nurse                                   | Research Site                                                                              |
| Jayne                             | Smith        |                       |                  | Poole Hospital                      | Dorset, England                          | Senior Research Facilitator                             | Research Site                                                                              |
| Deborah                           | Smyth        |                       | Mres             | University College Hospital         | London, England                          | Senior Nurse                                            | Research Site                                                                              |
| Catherine                         | Snelson      |                       | MBChB            | Birmingham Queen Elizabeth Hospital | Birmingham, England                      | Co-Investigator                                         | Research Site                                                                              |
| Michael                           | Spivey       |                       | FFICM            | Royal Cornwall Hospital             | Cornwall, England                        | Principal Investigator                                  | Research Site                                                                              |
| Elaine                            | Spruce       |                       | BSc              | Birmingham Queen Elizabeth Hospital | Birmingham, England                      | Research Nurse                                          | Research Site                                                                              |
| Charlotte                         | Summers      |                       | PhD              | Addenbrookes Hospital               | Cambridge, England                       | Principal Investigator                                  | Research Site                                                                              |
| Peter                             | Sutton       |                       | DPSN             | Birmingham Heartlands Hospital      | Birmingham, England                      | Research Nurse                                          | Research Site                                                                              |
| Tamas                             | Szakmany     |                       | PhD              | Royal Gwent Hospital                | Newport, Wales                           | Principal Investigator                                  | Research Site                                                                              |
| Nicholas                          | Talbot       |                       | MBChB            | Birmingham Queen Elizabeth Hospital | Birmingham, England                      | Co-Investigator                                         | Research Site                                                                              |
| Maie                              | Templeton    |                       | MSc              | Charing Cross & Hammersmith         | London, England                          | Research Nurse                                          | Research Site                                                                              |

## Supplemental Online Content: Nonauthor Collaborators

\*Indicates required information. Only first name, last name, and suffix will appear in PubMed.

| *First Name and Middle Initial(s) | *Last Name  | *Suffix (eg, Jr, III) | Academic Degrees | Institution                         | Location (city, state/province, country) | Role or Contribution, eg, chair, principal investigator | Group (if more than 1 Group listed in the byline) and/or Subgroup (eg, Steering Committee) |
|-----------------------------------|-------------|-----------------------|------------------|-------------------------------------|------------------------------------------|---------------------------------------------------------|--------------------------------------------------------------------------------------------|
| Jessica                           | Thrush      |                       | RGN              | Worcester Hospital                  | Worcestershire, England                  | Research Nurse                                          | Research Site                                                                              |
| Redmond                           | Tully       |                       | FFICM            | Royal Oldham Hospital               | Manchester, England                      | Principal Investigator                                  | Research Site                                                                              |
| William                           | Tunncliffe  |                       | MB               | Birmingham Queen Elizabeth Hospital | Birmingham, England                      | Principal Investigator                                  | Research Site                                                                              |
| Ian                               | Turner-Bone |                       | Dip HE           | Aintree Hospital                    | Liverpool, England                       | Research Nurse                                          | Research Site                                                                              |
| Tonny                             | Veenith     |                       | MBBS             | Birmingham Queen Elizabeth Hospital | Birmingham, England                      | Co-Investigator                                         | Research Site                                                                              |
| Alan                              | Vuylsteke   |                       | MD               | Papworth Hospital                   | Cambridge, England                       | Co-Investigator                                         | Research Site                                                                              |
| Andrew                            | Walden      |                       | MBBS             | Royal Berkshire Hospital            | Reading, England                         | Principal Investigator                                  | Research Site                                                                              |
| Jonathan                          | Walker      |                       | MBChB            | Royal Liverpool Hospital            | Liverpool, England                       | Co-Investigator                                         | Research Site                                                                              |
| Kathryn                           | Ward        |                       | Dip              | Royal Hospitals                     | Belfast, Northern Ireland                | Research Nurse                                          | Research Site                                                                              |
| Tim                               | Walsh       |                       | MD               | Edinburgh Royal Infirmary           | Edinburgh, Scotland                      | Co-Investigator                                         | Research Site                                                                              |
| Victoria                          | Waugh       |                       | BA               | Royal Liverpool Hospital            | Liverpool, England                       | Research Nurse                                          | Research Site                                                                              |
| Colin                             | Wells       |                       | Mres             | Derriford Hospital                  | Plymouth, England                        | Research Nurse                                          | Research Site                                                                              |
| Ingeborg                          | Welters     |                       | MD               | Royal Liverpool Hospital            | Liverpool, England                       | Principal Investigator                                  | Research Site                                                                              |
| Tony                              | Whitehouse  |                       | MBBS             | Birmingham Queen Elizabeth Hospital | Birmingham, England                      | Co-Investigator                                         | Research Site                                                                              |
| Arlo                              | Whitehouse  |                       | BSc              | Birmingham Queen Elizabeth Hospital | Birmingham, England                      | Research Nurse                                          | Research Site                                                                              |
| Christopher                       | Whitton     |                       | BSc              | University of Wales Hospital        | Cardiff, Wales                           | Research Nurse                                          | Research Site                                                                              |
| Elizabeth                         | Wilby       |                       | BSc(Hons)        | St James Hospital                   | Leeds, England                           | Research Nurse                                          | Research Site                                                                              |
| Danielle                          | Wilcox      |                       | BSc(Hons)        | York Teaching Hospital              | York, England                            | Research Nurse                                          | Research Site                                                                              |
| Laura                             | Wilding     |                       | Dip HE           | Aintree Hospital                    | Liverpool, England                       | Research Nurse                                          | Research Site                                                                              |
| James                             | Williams    |                       | MBBS             | Royal Gwent Hospital                | Newport, Wales                           | Co-Investigator                                         | Research Site                                                                              |
| Karen                             | Williams    |                       | PGDip            | Royal Liverpool Hospital            | Liverpool, England                       | Research Nurse                                          | Research Site                                                                              |
| Sarah                             | Winnard     |                       | BSc(Hons)        | Royal Oldham Hospital               | Manchester, England                      | Research Nurse                                          | Research Site                                                                              |
| Lindsey                           | Woods       |                       | BSc(Hons)        | Sunderland Royal Hospital           | Tyne and Wear, England                   | Research Nurse                                          | Research Site                                                                              |
| Chris                             | Wright      |                       | MRCP             | Glasgow Queen Elizabeth             | Glasgow, Scotland                        | Co-Investigator                                         | Research Site                                                                              |
| Neil H                            | Young       |                       | MB               | Edinburgh Royal Infirmary           | Edinburgh, Scotland                      | Co-Investigator                                         | Research Site                                                                              |

## Supplemental Online Content: Nonauthor Collaborators

\*Indicates required information. Only first name, last name, and suffix will appear in PubMed.

| <b>*First Name and Middle Initial(s)</b> | <b>*Last Name</b> | <b>*Suffix (eg, Jr, III)</b> | Academic Degrees | Institution               | Location (city, state/province, country) | Role or Contribution, eg, chair, principal investigator | Group (if more than 1 Group listed in the byline) and/or Subgroup (eg, Steering Committee) |
|------------------------------------------|-------------------|------------------------------|------------------|---------------------------|------------------------------------------|---------------------------------------------------------|--------------------------------------------------------------------------------------------|
| Xiaobei                                  | Zhao              |                              | RN<br>BSc(Hons)  | Watford General Hospital  | Watford, England                         | Research Nurse                                          | Research Site                                                                              |
| Parjam                                   | Zolfaghari        |                              | PhD              | Royal London Hospital     | London, England                          | Principal Investigator                                  | Research Site                                                                              |
| Alistair                                 | Nichol            |                              | PhD              | University College Dublin | Ireland                                  | Collaborator                                            | Irish Critical Care Clinical Trials Network                                                |
