# Supplementary material
Source: PubMed Central journal article supplement (PMC8408762)
Supplement: jama-e2113374-s006.pdf [file jama-e2113374-s006.pdf]

## Data Sharing Statement

### Data

**Data available:** Yes

**Data types:** Other (please specify)

**Additional Information:** Data will be available to researchers on request subject to sponsor restrictions

**How to access data:** Contact Colette Jackson at [colette.jackson@nictu.hscni.net](mailto:colette.jackson@nictu.hscni.net)

**When available:** beginning date: 04-01-2022

### Supporting Documents

**Document types:** None

### Additional Information

**Who can access the data:** Researchers whose proposed use of the data has been approved. Contact Colette Jackson at [colette.jackson@nictu.hscni.net](mailto:colette.jackson@nictu.hscni.net)

**Types of analyses:** For specified purpose

**Mechanisms of data availability:** With investigator support
